# Supplementary material for: Molecular Epidemiology of Fosfomycin Resistant E. coli from a Pigeon Farm in China
Source: MDPI journal article supplement (doi:10.3390/antibiotics10070777), 2021-06-25
Supplement: s1 [file s1]

## Supplementary Materials

Article

# Molecular Epidemiology of Fosfomycin Resistant *E. coli* from a Pigeon Farm in China

Lu Han <sup>1,2,†</sup>, Xiao-Qing Lu <sup>1,2,†</sup>, Xu-Wei Liu <sup>1,2</sup>, Mei-Na Liao <sup>1,2</sup>, Ruan-Yang Sun <sup>1,2</sup>, Yao Xie <sup>1,2</sup>, Xiao-Ping Liao <sup>1,2,3</sup>, Ya-Hong Liu <sup>1,2,3</sup>, Jian Sun <sup>1,2,3</sup> and Rong-Min Zhang <sup>1,2,3,\*</sup>

<sup>1</sup> National Risk Assessment Laboratory for Antimicrobial Resistance of Animal Original Bacteria, College of Veterinary Medicine, South China Agricultural University, Guangzhou 510642, P. R. China; lu-han@stu.scau.edu.cn (L.H.);

lxq@stu.scau.edu.cn (X.-Q.L.); xwliu11@stu.scau.edu.cn (X.-W.L.); lmn@stu.scau.edu.cn (M.-N.L.); sunruanyang@163.com (R.-Y.S.); 2017zrm@stu.scau.edu.cn (Y.X.); xpliao@scau.edu.cn (X.-P.L.); lyh@scau.edu.cn (Y.-H.L.); jiansun@scau.edu.cn (J.S.)

<sup>2</sup> Guangdong Provincial Key Laboratory of Veterinary Pharmaceuticals Development and Safety Evaluation, College of Veterinary Medicine, South China Agricultural University, Guangzhou 510642, P. R. China

<sup>3</sup> Guangdong Laboratory for Lingnan Modern Agriculture, South China Agricultural University, Guangzhou, China

\* Correspondence: zrm@scau.edu.cn

† These authors contributed equally to this work.

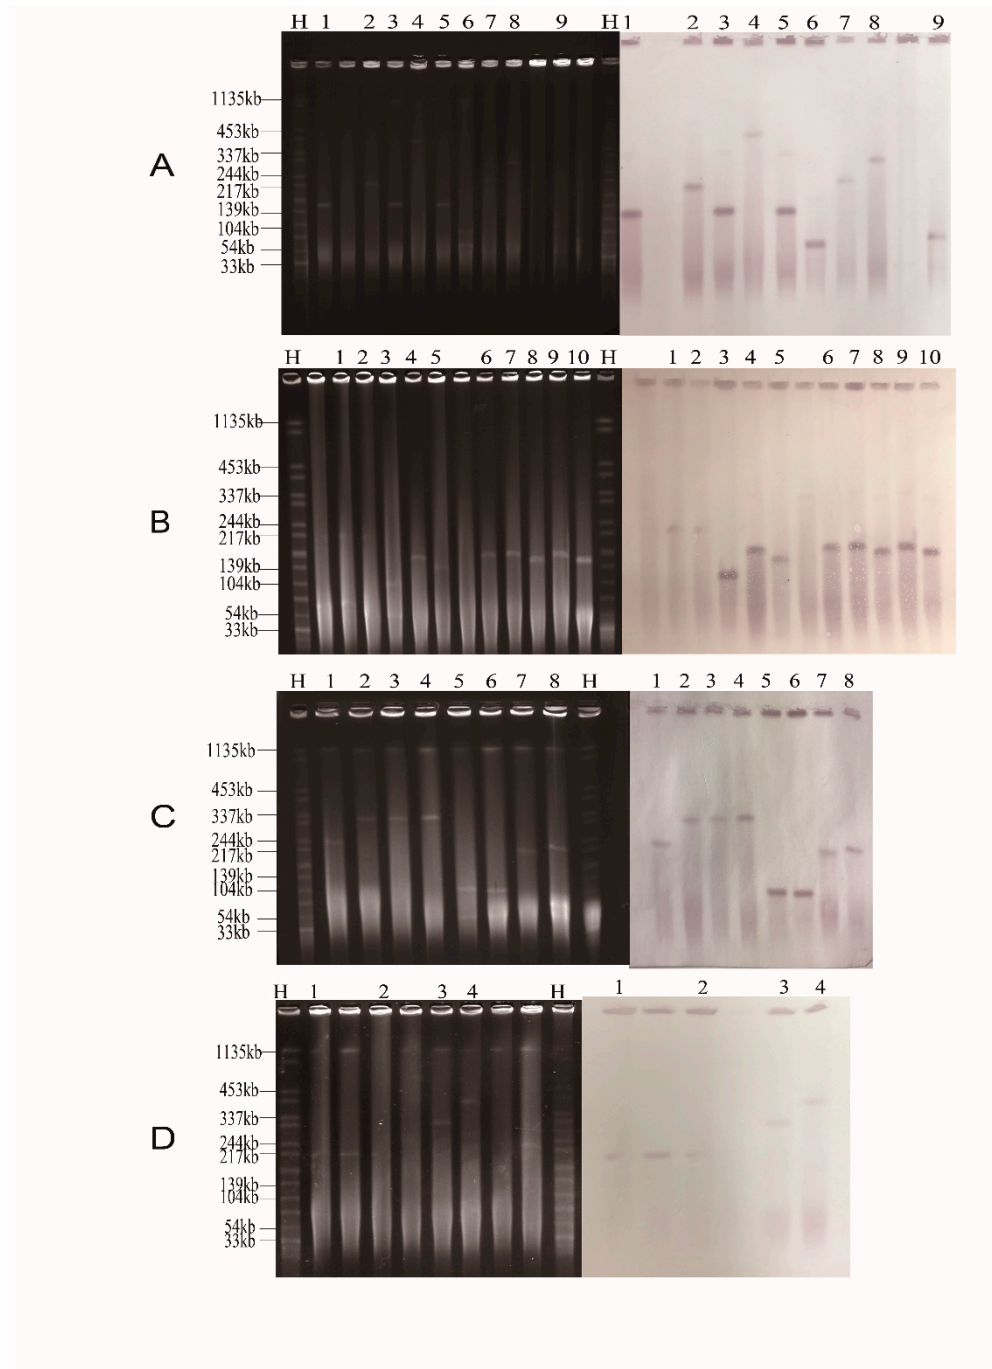

**Figure S1.** S1-nuclease PFGE mapping and Southern blot analysis of *fosA3*-carrying plasmids on different sizes. A. Strains present in lanes 1 to 9 were B4, E9-1, M6-1, W1-1, B20-2-2, W3-1, Y1-1-1, E15-1, and M1-2, respectively. B. Strains present in Lanes 1 to 10 were E3, W6-2-1, M5-1, B20-1-1, B20-1-2, E4-1, E5, E9-2, W6-2-2, and E4-2-2, respectively. C. Strains present in Lanes 1 to 8 were X2-3, W2-1, E19-2, E13-2, B17-1-2, E11- 2, B15-2 and E2, respectively. D. Strains present in Lanes 1 to 4 were E6-1, W6-2-1, M4-1, and M1-1, respectively. H, H9812 marker.

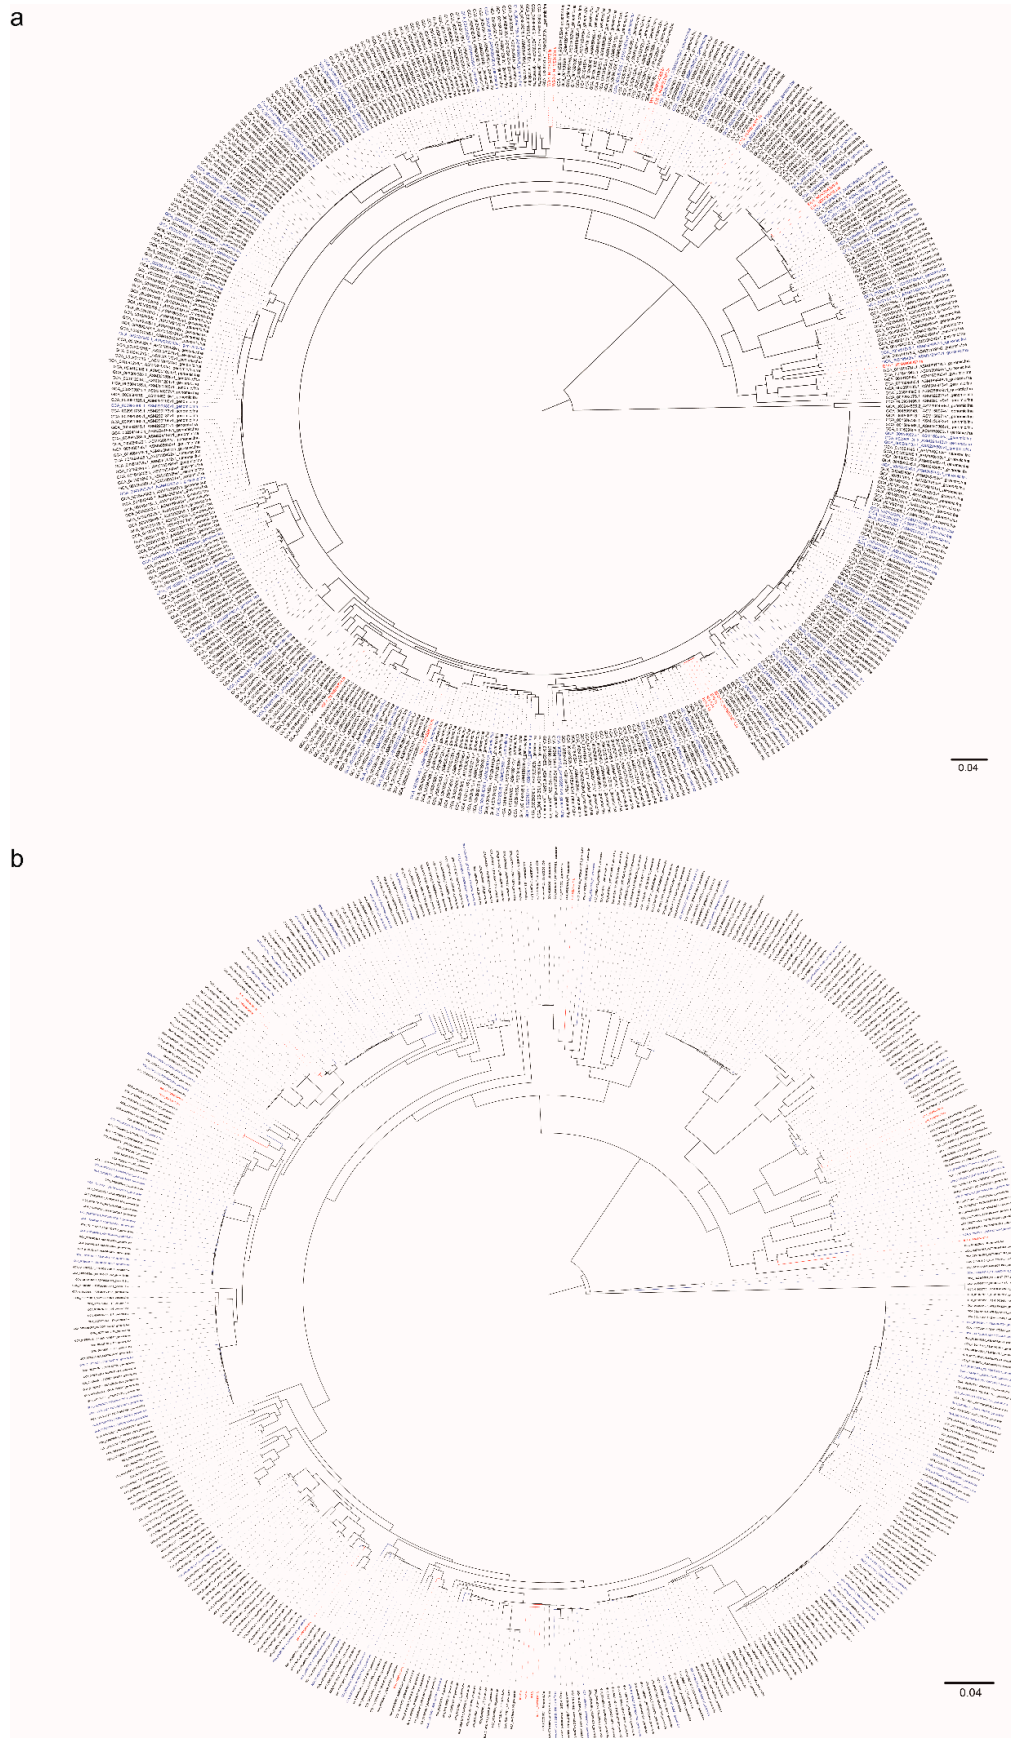

**Figure S2.** Phylogenetic analysis of the *fosA3* positive *E. coli* from public repository and current study. The 915 *fosA3* positive *E. coli* from public repository were divided into two groups randomly and each group were employed to constructed a phylogenetic tree with the 14 isolates in current study (a and b), respectively. The red clades represent the *fosA3* positive *E. coli* in this study and the blue clades represent the selected 130 representative isolates.

**Table S1.** Sample collection, strain identification and MIC results.

[illegible]

|         |                    |       |                          |   |     |      |    |     |       |     |   |     |      |   |                                    |
|---------|--------------------|-------|--------------------------|---|-----|------|----|-----|-------|-----|---|-----|------|---|------------------------------------|
| W9-2    | sewage             |       | <i>Proteus mirabilis</i> |   |     |      |    |     |       |     |   |     |      |   |                                    |
| X1-1    | liquor peri-cardii |       |                          |   |     |      |    |     |       |     |   |     |      |   |                                    |
| X2-3    | liquor peri-cardii | fosA3 | <i>E. coli</i>           | 1 | 160 | 128  | 16 | 16  | 0.03  | 128 | 2 | 4   | >256 | 2 | FOS CTX TET CIP AMP S/T CS         |
| X4-2    | liquor peri-cardii |       | <i>P. mirabilis</i>      |   |     |      |    |     |       |     |   |     |      |   |                                    |
| X5-1    | liquor peri-cardii |       | <i>E. coli</i>           |   |     |      |    |     |       |     |   |     |      |   |                                    |
| X1-3-1  | liquor peri-cardii |       | <i>E. coli</i>           |   |     |      |    |     |       |     |   |     |      |   |                                    |
| X1-3-2  | liquor peri-cardii |       | <i>P. mirabilis</i>      |   |     |      |    |     |       |     |   |     |      |   |                                    |
| Y1-1-1  | flies              | fosA3 | <i>E. coli</i>           | 1 | 160 | 128  | 16 | 16  | 0.03  | 128 | 2 | 4   | >256 | 2 | FOS CTX TET CIP AMP S/T            |
| Y1-1-2  | flies              |       |                          |   |     |      |    |     |       |     |   |     |      |   |                                    |
| Y1-2    | flies              |       |                          |   |     |      |    |     |       |     |   |     |      |   |                                    |
| Y1-3    | flies              |       | <i>P. mirabilis</i>      |   |     |      |    |     |       |     |   |     |      |   |                                    |
| Y2-1    | flies              |       |                          |   |     |      |    |     |       |     |   |     |      |   |                                    |
| Y2-2    | flies              |       | <i>C. freundii</i>       |   |     |      |    |     |       |     |   |     |      |   |                                    |
| M4-1    | cecum contents     | fosA3 | <i>E. coli</i>           | 1 | 160 | >256 | 16 | 16  | 0.03  | 64  | 4 | 8   | >256 | 2 | FOS CTX TET CIP AMP S/T CS         |
| M4-2    | cecum contents     | fosA3 | <i>E. coli</i>           | 1 | 160 | >256 | 16 | 16  | 0.03  | 32  | 4 | 8   | >256 | 2 | FOS CTX TET CIP AMP S/T CS         |
| E15-1   | Pigeon feces       | fosA3 | <i>E. coli</i>           | 1 | 160 | >256 | 2  | 64  | 0.015 | 64  | 1 | 8   | >256 | 2 | FOS CTX TET CIP AMP S/T GEN CS     |
| E15-2   | Pigeon feces       | fosA3 | <i>E. coli</i>           | 1 | 160 | >256 | 8  | 16  | 0.03  | 32  | 2 | 4   | >256 | 2 | FOS CTX TET CIP AMP S/T CS         |
| M1-1    | cecum contents     | fosA3 | <i>E. coli</i>           | 1 | 160 | >256 | 4  | 64  | 0.015 | 128 | 1 | 4   | >256 | 2 | FOS CTX TET CIP AMP S/T GEN CS     |
| M1-2    | cecum contents     | fosA3 | <i>E. coli</i>           | 1 | 20  | >256 | 32 | 16  | 0.03  | 128 | 2 | 4   | >256 | 1 | FOS CTX TET CIP AMP CS             |
| B17-1-1 | Pigeon feces       |       | <i>P. mirabilis</i>      |   |     |      |    |     |       |     |   |     |      |   |                                    |
| B17-1-2 | Pigeon feces       | fosA3 | <i>E. coli</i>           | 1 | 20  | >256 | 32 | 16  | 0.03  | 128 | 2 | 2   | >256 | 1 | FOS CTX TET CIP AMP CS             |
| E16     | Pigeon feces       | fosA3 | <i>E. coli</i>           | 1 | 160 | >256 | 16 | 128 | 0.03  | 64  | 2 | 128 | >256 | 2 | FOS CTX TET CIP AMP S/T FFC CS     |
| E19-2   | Pigeon feces       | fosA3 | <i>E. coli</i>           | 1 | 160 | >256 | 8  | 64  | 0.015 | 64  | 1 | 32  | >256 | 2 | FOS CTX TET CIP AMP S/T FFC GEN CS |
| B15-2   | Pigeon feces       | fosA3 | <i>E. coli</i>           | 1 | 160 | >256 | 8  | 16  | 0.03  | 32  | 2 | 8   | >256 | 2 | FOS CTX TET CIP AMP S/T CS         |
| E2      | Pigeon feces       | fosA3 | <i>E. coli</i>           | 1 | 160 | >256 | 8  | 256 | 0.03  | 64  | 1 | 128 | >256 | 1 | FOS CTX TET CIP AMP S/T FFC CS     |
| X4-3    | cecum contents     |       | <i>P. mirabilis</i>      |   |     |      |    |     |       |     |   |     |      |   |                                    |
| X4-4    | cecum contents     |       | <i>P. mirabilis</i>      |   |     |      |    |     |       |     |   |     |      |   |                                    |
| X5-2    | cecum contents     |       | <i>E. coli</i>           |   |     |      |    |     |       |     |   |     |      |   |                                    |
| E7-1    | Pigeon feces       | fosA3 | <i>E. coli</i>           | 1 | 160 | >256 | 16 | 256 | 0.03  | 128 | 1 | 128 | >256 | 2 | FOS CTX TET CIP AMP S/T FFC CS     |

|        |              |       |                          |    |     |      |    |     |       |     |      |     |      |   |                                |
|--------|--------------|-------|--------------------------|----|-----|------|----|-----|-------|-----|------|-----|------|---|--------------------------------|
| E7-2   | Pigeon feces | fosA3 | <i>E. coli</i>           | 1  | 160 | >256 | 16 | 128 | 0.03  | 64  | 2    | 128 | >256 | 2 | FOS CTX TET CIP AMP S/T FFC CS |
| E7-3   | Pigeon feces | fosA3 | <i>E. coli</i>           | 1  | 160 | >256 | 16 | 128 | 0.03  | 64  | 2    | 64  | >256 | 2 | FOS CTX TET CIP AMP S/T FFC CS |
| E6-1   | Pigeon feces | fosA3 | <i>E. coli</i>           | 1  | 160 | >256 | 4  | 256 | 0.03  | 128 | 1    | 128 | >256 | 1 | FOS CTX TET CIP AMP S/T FFC CS |
| E6-2   | Pigeon feces |       | <i>P. mirabilis</i>      |    |     |      |    |     |       |     |      |     |      |   |                                |
| E3     | Pigeon feces | fosA3 | <i>E. coli</i>           | 1  | 160 | >256 | 8  | 256 | 0.03  | 64  | 1    | 128 | >256 | 4 | FOS CTX TET CIP AMP S/T FFC CS |
| E4-1   | Pigeon feces | fosA3 | <i>E. coli</i>           | 1  | 2.5 | >256 | 8  | 64  | 0.03  | 64  | 2    | 4   | >256 | 2 | FOS CTX TET CIP AMP CS         |
| E5     | Pigeon feces | fosA3 | <i>E. coli</i>           | 1  | 2.5 | >256 | 8  | 64  | 0.03  | 64  | 2    | 2   | >256 | 2 | FOS CTX TET CIP AMP CS         |
| E9-2   | Pigeon feces | fosA3 | <i>E. coli</i>           | 1  | 2.5 | >256 | 8  | 64  | 0.03  | 2   | 2    | 2   | >256 | 2 | FOS CTX TET CIP AMP CS         |
| E11-2  | Pigeon feces | fosA3 | <i>E. coli</i>           | 1  | 2.5 | >256 | 64 | 32  | 0.03  | 128 | 2    | 4   | >256 | 1 | FOS CTX TET CIP AMP CS         |
| E13-2  | Pigeon feces | fosA3 | <i>E. coli</i>           | 1  | 160 | >256 | 4  | 64  | 0.015 | 128 | 1    | 4   | >256 | 2 | FOS CTX TET CIP AMP S/T GEN CS |
| W5-3-1 | sewage       | fosA3 | <i>E. coli</i>           | 1  | 160 | >256 | 8  | 16  | 0.03  | 64  | 2    | 4   | >256 | 2 | FOS CTX TET CIP AMP S/T FFC CS |
| W5-3-2 | sewage       | fosA3 | <i>E. coli</i>           | 1  | 80  | >256 | 8  | 16  | 0.03  | 64  | 4    | 8   | >256 | 2 | FOS CTX TET CIP AMP S/T CS     |
| W6-2-1 | sewage       | fosA3 | <i>E. coli</i>           | 1  | 2.5 | >256 | 8  | 64  | 0.03  | 64  | 2    | 2   | >256 | 2 | FOS CTX TET CIP AMP S/T CS     |
| W6-2-2 | sewage       | fosA3 | <i>E. coli</i>           | 1  | 2.5 | >256 | 8  | 64  | 0.03  | 64  | 2    | 2   | >256 | 2 | FOS CTX TET CIP AMP CS         |
| C1-1   | dust         |       |                          |    |     |      |    |     |       |     |      |     |      |   |                                |
| C1-2   | dust         |       | <i>Proteus mirabilis</i> |    |     |      |    |     |       |     |      |     |      |   |                                |
| C1-3   | dust         |       |                          |    |     |      |    |     |       |     |      |     |      |   |                                |
| E4-2-1 | Pigeon feces | fosA3 | <i>E. coli</i>           | 8  | 160 | >256 | 4  | 256 | 0.03  | 128 | 1    | 128 | >256 | 1 | FOS CTX TET CIP AMP S/T FFC CS |
| E4-2-2 | Pigeon feces | fosA3 | <i>E. coli</i>           | 16 | 2.5 | >256 | 8  | 64  | 0.03  | 64  | >256 | 128 | >256 | 2 | FOS CTX TET CIP AMP GEN FFC CS |
